# Supplementary material for: Activated carbon materials derived from liquefied bark-phenol formaldehyde resins for high performance supercapacitors
Source: Royal Society of Chemistry journal article supplement (doi:10.1039/c6ra20373f), 2016-01-01
Supplement: c6ra20373f1.pdf [file c6ra20373f1.pdf]

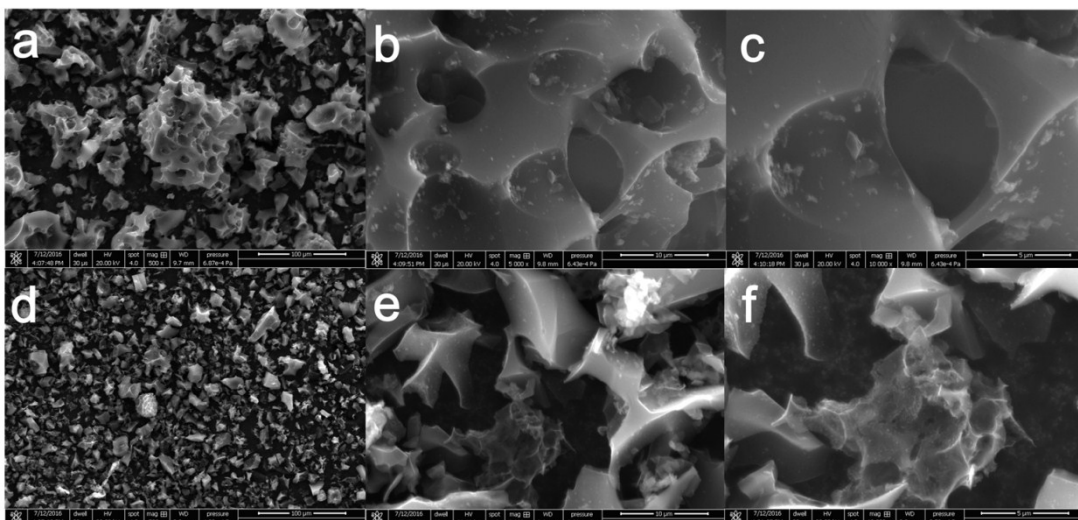

Fig. S1 SEM images: (a-c) BRC-3; (d-f) BRC-4

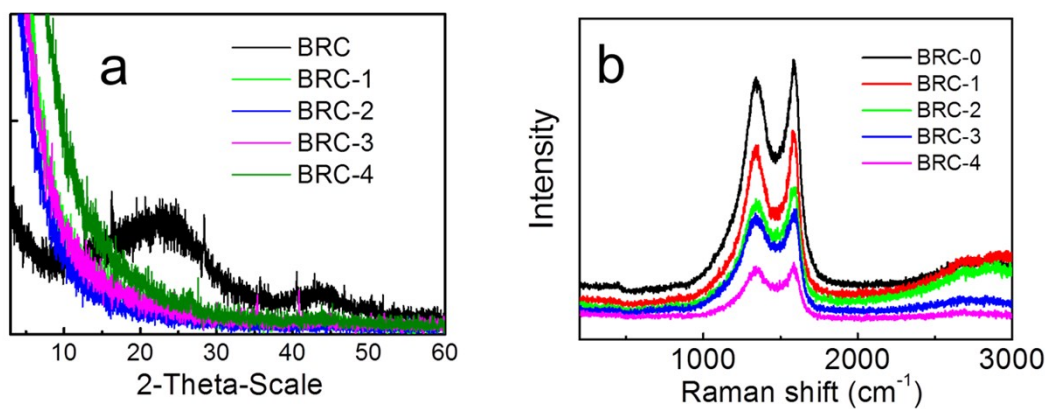

Fig. S2 (a) XRD patterns and (b) Raman spectra of the BRC-x materials

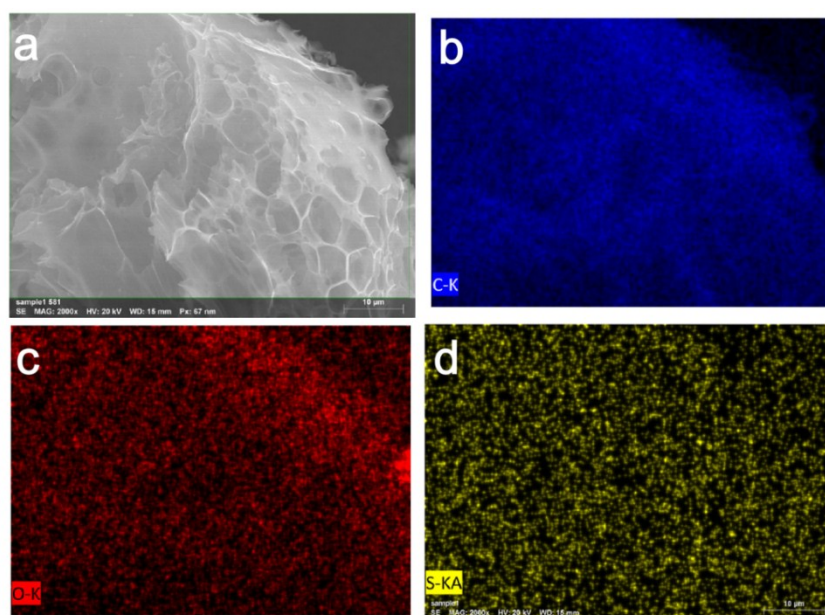

Fig. S3 EDS mapping of BRC-2: (a) selected area, (b) C, (c) O and (d) S

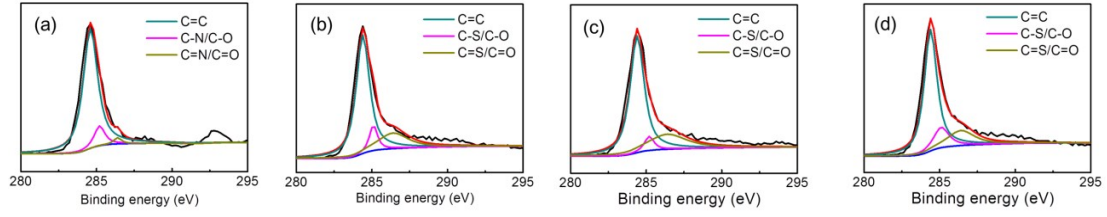

**Fig. S4** C1s spectra (a) BRC, (b) BRC-1, (c) BRC-3 and (d) BRC-4

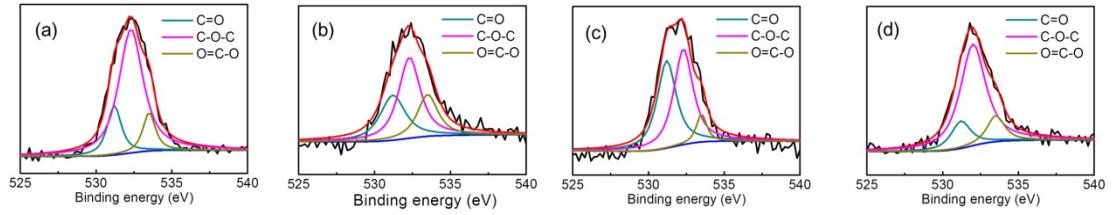

**Fig. S5** O1s spectra (a) BRC, (b) BRC-1, (c) BRC-3 and (d) BRC-4

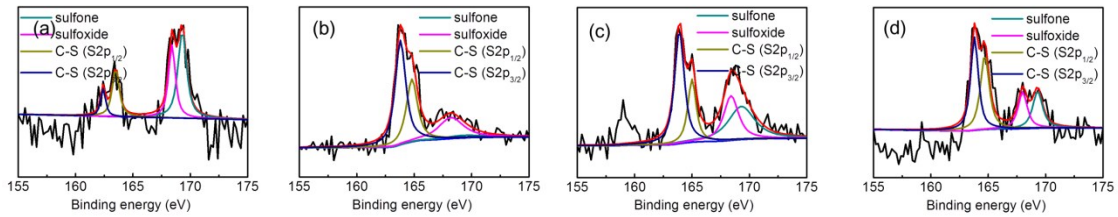

**Fig. S6** S2p spectra (a) BRC, (b) BRC-1, (c) BRC-3 and (d) BRC-4

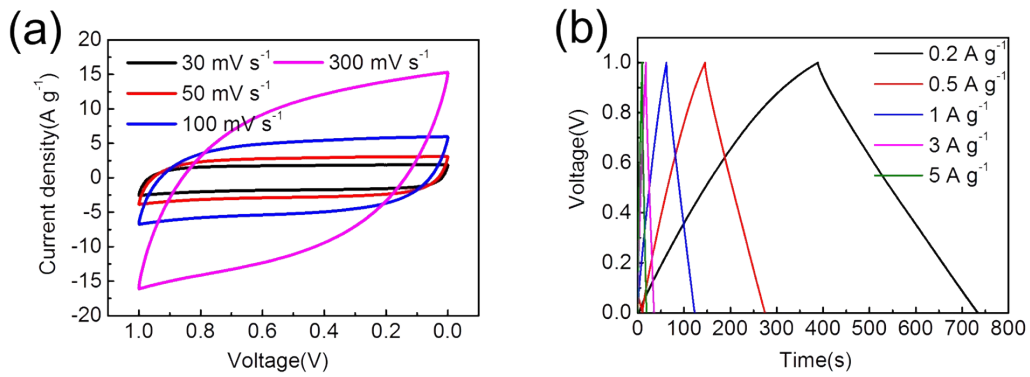

**Fig. S7** (a) CV curves and (b) Galvanostatic charge/discharge curves of BRC-2

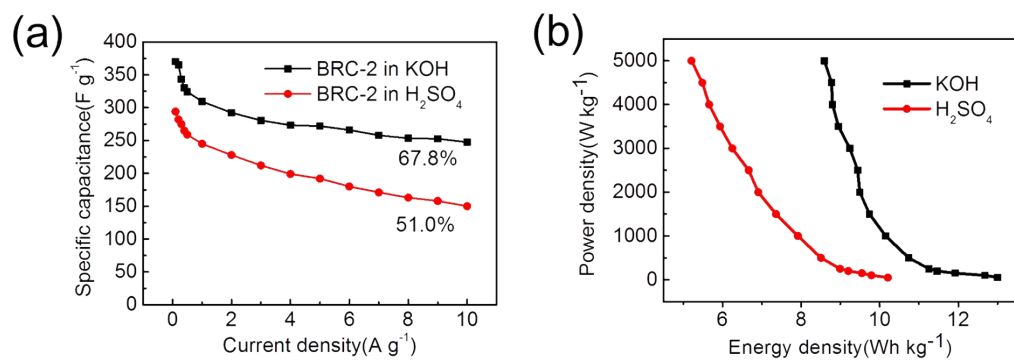

**Fig. S8** Comparison of BRC-2 in KOH and  $H_2SO_4$  electrolyte
